# Supplementary material for: Enhanced solar absorption and photoelectrochemical properties of Al-reduced TiO2/TiO2−x/CdS heterojunction nanorods
Source: Royal Society of Chemistry journal article supplement (doi:10.1039/d3nj01610b), 2023-01-01
Supplement: d3nj01610b1.pdf [file d3nj01610b1.pdf]

**Supplementary Information to**

**Enhanced solar absorption and photoelectrochemical properties  
of Al-reduced TiO<sub>2</sub>/TiO<sub>2-x</sub>/CdS heterojunction nanorods**

Xiao Li, Jingshan Hou, Jing Wang, Yanwei Huang, Guoying Zhao, Ganghua Zhang\*  
and Yongzheng Fang\*

*School of Materials Science and Engineering, Shanghai Institute of Technology,  
Shanghai, 201418, P. R. China;*

***E-mails:*** ganghuazhang@sit.edu.cn (G.H. Zhang) and fyz1003@sina.com (Y.Z. Fang)

**Fig. S1** (a) EDS results for  $\text{TiO}_2/\text{TiO}_{2-x}/\text{CdS}$  composite film. (b) Elemental mapping images of Cd, O, S, and Ti elements.

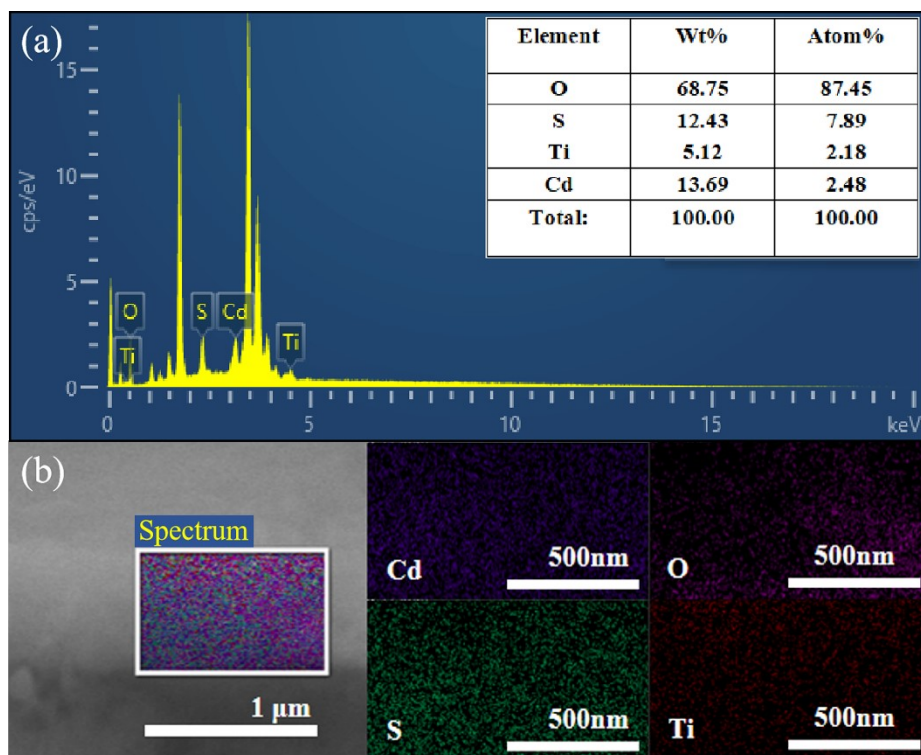

**Fig. S2** Optical photographs of film electrodes.

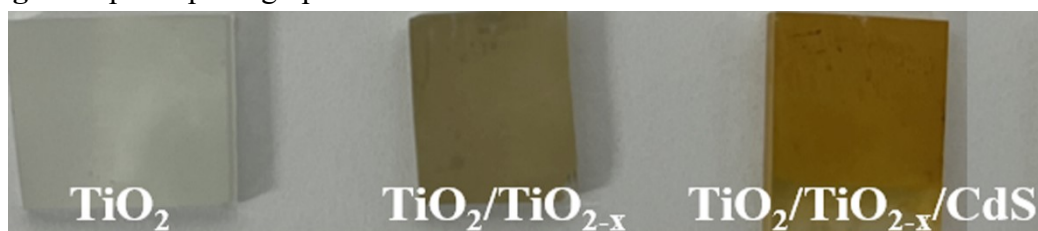

**Fig. S3** The optical bandgaps of  $\text{TiO}_2/\text{TiO}_{2-x}$  film samples prepared at different Al-reduction temperatures.

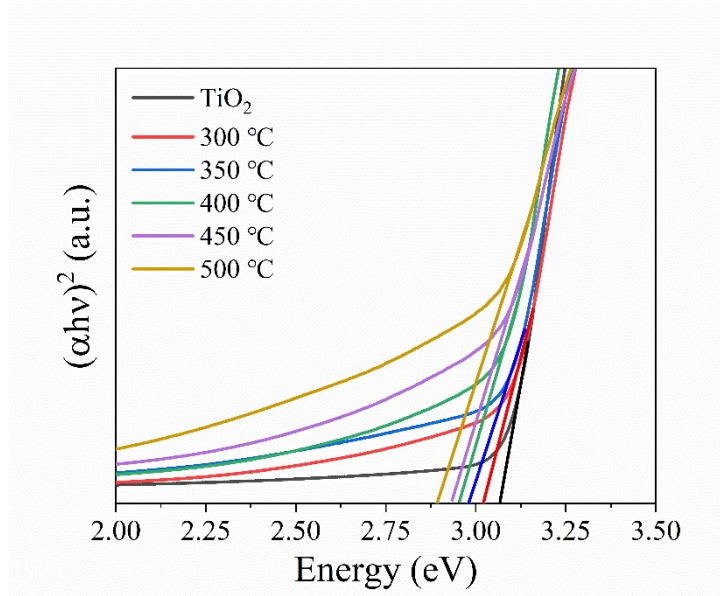

**Fig. S4** Resistance value of FTO conductive glass annealed at different Al-reduction temperatures.

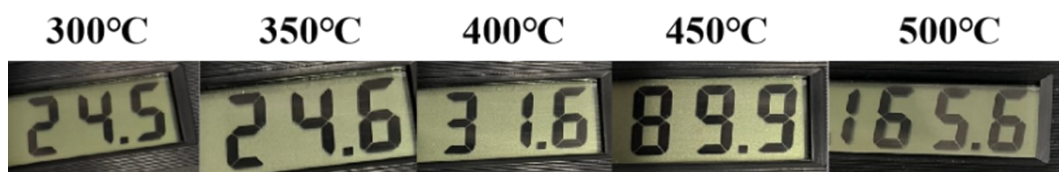

**Fig. S5** Photocurrent densities of  $\text{TiO}_2/\text{TiO}_{2-x}/\text{CdS}$  after exposing to air for six months (a) and the XRD patterns of  $\text{TiO}_2/\text{TiO}_{2-x}/\text{CdS}$  before and after photostability test (b).

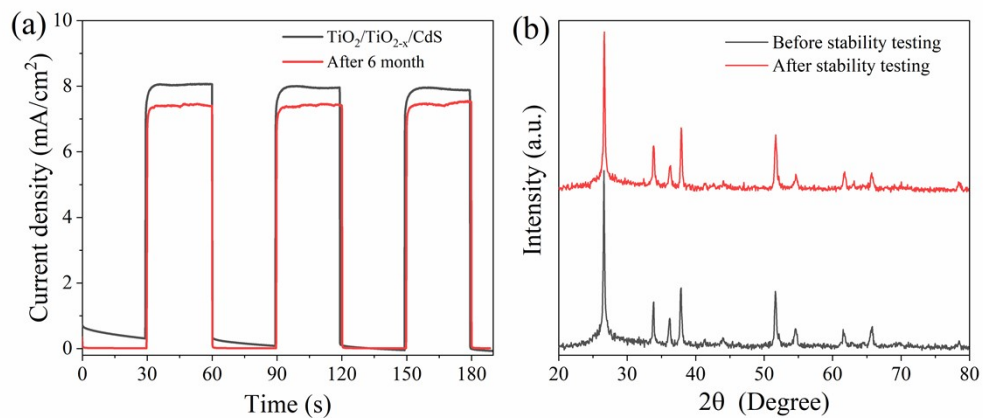

**Fig. S6** The Mott-Schottky plots of  $\text{TiO}_2/\text{TiO}_{2-x}$  and CdS.

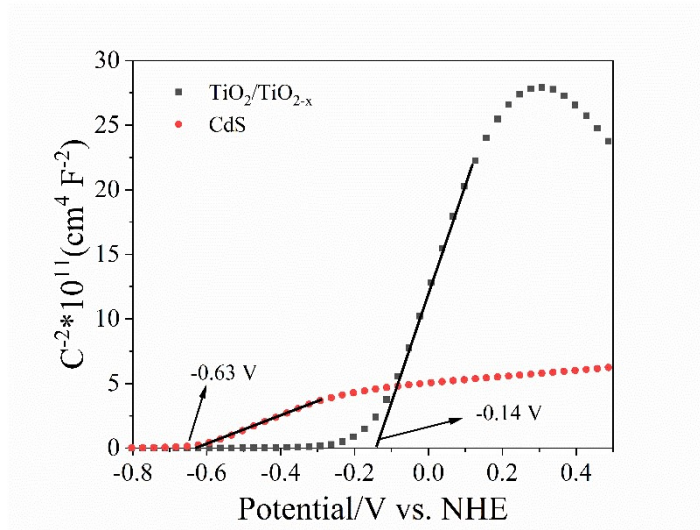

**Table S1** PEC performances of the TiO<sub>2</sub>/CdS related photoanodes.

| photoanodes             | photocurrent density (bias)                 | light and intensity<br>(100 mW/cm <sup>2</sup> ) | electrolyte                            | ref |
|-------------------------|---------------------------------------------|--------------------------------------------------|----------------------------------------|-----|
| (nanoparticles)         |                                             |                                                  | 1 M Na <sub>2</sub> S                  | 1   |
| TiO <sub>2</sub> /CdS   | 4.63 mA/cm <sup>2</sup> (-0.2V vs. Ag/AgCl) |                                                  |                                        |     |
| (nanosheet arrays)      |                                             | simulated light 500 W                            | 0.25 M Na <sub>2</sub> S +             | 2   |
| TiO <sub>2</sub> /CdS   | 3.24 mA/cm <sup>2</sup> (0V vs. Ag/AgCl)    | Xe lamp                                          | 0.35 M Na <sub>2</sub> SO <sub>3</sub> |     |
| (nanorod arrays)        |                                             | simulated light 500 W                            | 1 M Na <sub>2</sub> S                  | 3   |
| TiO <sub>2</sub> /CdS   | 5.778 mA/cm <sup>2</sup> (0V vs. Ag/AgCl)   | Xe lamp                                          |                                        |     |
| (nanotube arrays)       |                                             | simulated light 500 W                            | 0.25 M Na <sub>2</sub> S +             | 4   |
| H:TiO <sub>2</sub> /CdS | 2.0 mA/cm <sup>2</sup> (-0.43V vs. Ag/AgCl) | Xe lamp                                          | 0.35 M Na <sub>2</sub> SO <sub>3</sub> |     |
| (nanobullet arrays)     |                                             |                                                  | 0.25 M Na <sub>2</sub> S +             | 5   |
| H:TiO <sub>2</sub> /CdS | 0.5 mA/cm <sup>2</sup> (0 V vs Ag/AgCl)     |                                                  | 0.35 M Na <sub>2</sub> SO <sub>3</sub> |     |
| (nanowire arrays)       |                                             | simulated light 150 W                            | 0.25 M Na <sub>2</sub> S +             | 6   |
| H:TiO <sub>2</sub> /CdS | 4.0 mA/cm <sup>2</sup> (0.5 V vs. RHE)      | Xe lamp                                          | 0.35 M Na <sub>2</sub> SO <sub>3</sub> |     |
| H:CdS/TiO <sub>2</sub>  | 7.2 mA/cm <sup>2</sup> (0.5 V vs. RHE)      |                                                  |                                        |     |

### Notes and references

- [1] S. S. Kalanur, Y. J. Hwang and O. S. Joo, *J. Colloid Interface Sci.*, 2013, **402**, 94-99.
- [2] H. Yao, W. Fu, H. Yang, J. Ma, M. Sun, Y. Chen and M. Li, *Electrochim. Acta*, 2014, **125**, 258-265.
- [3] H. Wang, Y. Bai, H. Zhang, Z. Zhang, J. Li and L. Guo, *J. Phys. Chem. C.*, 2010, **114**, 16451-16455.
- [4] P. Lv, H. Yang, W. Fu, H. Sun, W. Zhang, M. Li and S. Su, *CrystEngComm*, 2014, **16**, 6955-6962.
- [5] Y. S. Chang, M. Choi, M. Baek, P. Y. Hsieh, K. Yong and Y. J. Hsu, *Appl. Catal. B Environ.*, 2018, **225**, 379-385.
- [6] H. Wang, G. Wang, Y. Ling, M. Lepert, C. Wang, J. Z. Zhang and Y. Li, *Nanoscale*, 2012, **4**, 1463-1466.

**Table S2** Parameters obtained from time-resolved PL decay curves according to a double-exponential decay.

| Sample                                    | $A_1$   | $\tau_1$ ( $\mu\text{s}$ ) | $A_2$   | $\tau_2$ ( $\mu\text{s}$ ) | $\tau$ ( $\mu\text{s}$ ) |
|-------------------------------------------|---------|----------------------------|---------|----------------------------|--------------------------|
| TiO <sub>2</sub>                          | 0.58898 | 0.19513                    | 0.19837 | 1.09393                    | 0.78                     |
| CdS                                       | 0.71859 | 0.23258                    | 0.17371 | 1.32039                    | 0.86                     |
| TiO <sub>2</sub> /TiO <sub>2-x</sub>      | 0.40952 | 0.19322                    | 0.19627 | 1.22371                    | 0.96                     |
| TiO <sub>2</sub> /TiO <sub>2-x</sub> /CdS | 0.46588 | 0.21779                    | 0.25027 | 1.5294                     | 1.25                     |
